# Supplementary material
Source: PubMed Central journal article supplement (PMC7367440)
Supplement: NIHMS1579211-supplement-Supp_FigS1.pdf [file NIHMS1579211-supplement-Supp_FigS1.pdf]

**Fig. S1**

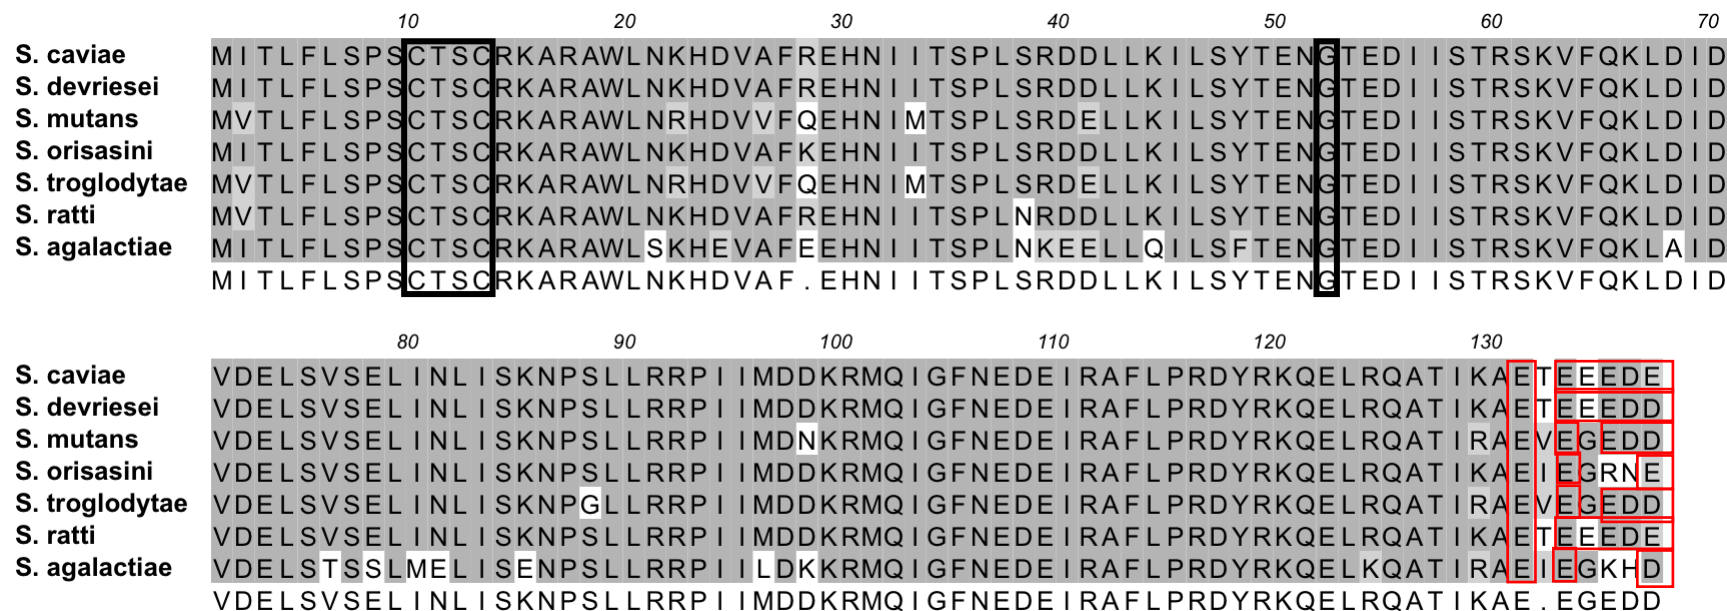

**Figure S1.** ClustalW alignment of streptococcal SpxA1 proteins containing multiple acidic residues at the C-terminal tail. Location of the CXXC motif and conserved glycine 52 residue typical of bona fide Spx proteins are indicated inside black boxes. Acidic residues within the last 10 amino acids are shown inside red boxes.
