# Supplementary material
Source: PubMed Central journal article supplement (PMC7367440)
Supplement: NIHMS1579211-supplement-Supp_FigS2.pdf [file NIHMS1579211-supplement-Supp_FigS2.pdf]

**Fig. S2**

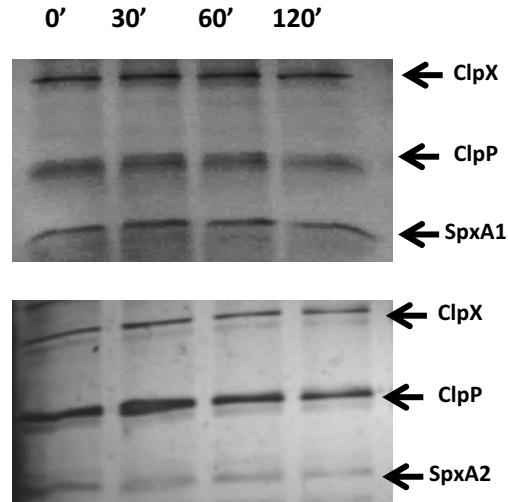

**Figure S2.** Reconstituted *in-vitro* proteolysis of SpxA1 and SpxA2 by the ClpXP system. Spx degradation was monitored over time and compared with ClpP protein intensity at each time points to determine rate of degradation. (See experimental procedures for the details).
