# Supplementary material
Source: PubMed Central journal article supplement (PMC7367440)
Supplement: NIHMS1579211-supplement-Supp_FigS3.pdf [file NIHMS1579211-supplement-Supp_FigS3.pdf]

**Fig. S3**

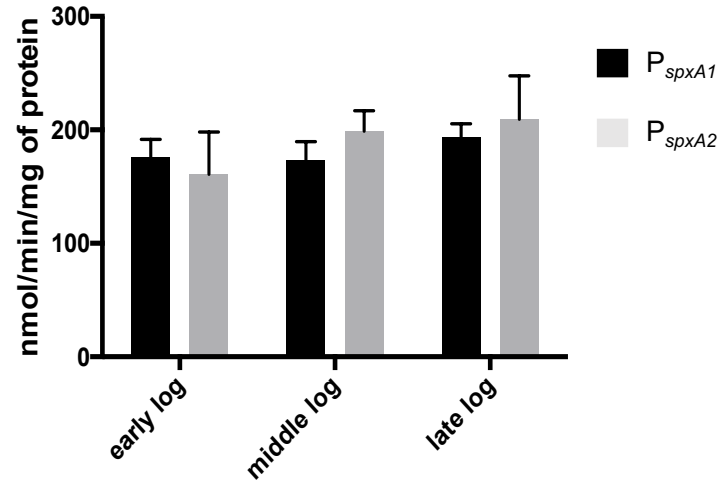

**Figure S3.** CAT activity driven from P<sub>spxA1</sub> or P<sub>spxA2</sub> during the different phases of growth (see experimental procedures for details).
