# Supplementary material
Source: PubMed Central journal article supplement (PMC7367440)
Supplement: NIHMS1579211-supplement-Supp_FigS4.pdf [file NIHMS1579211-supplement-Supp_FigS4.pdf]

Fig. S4

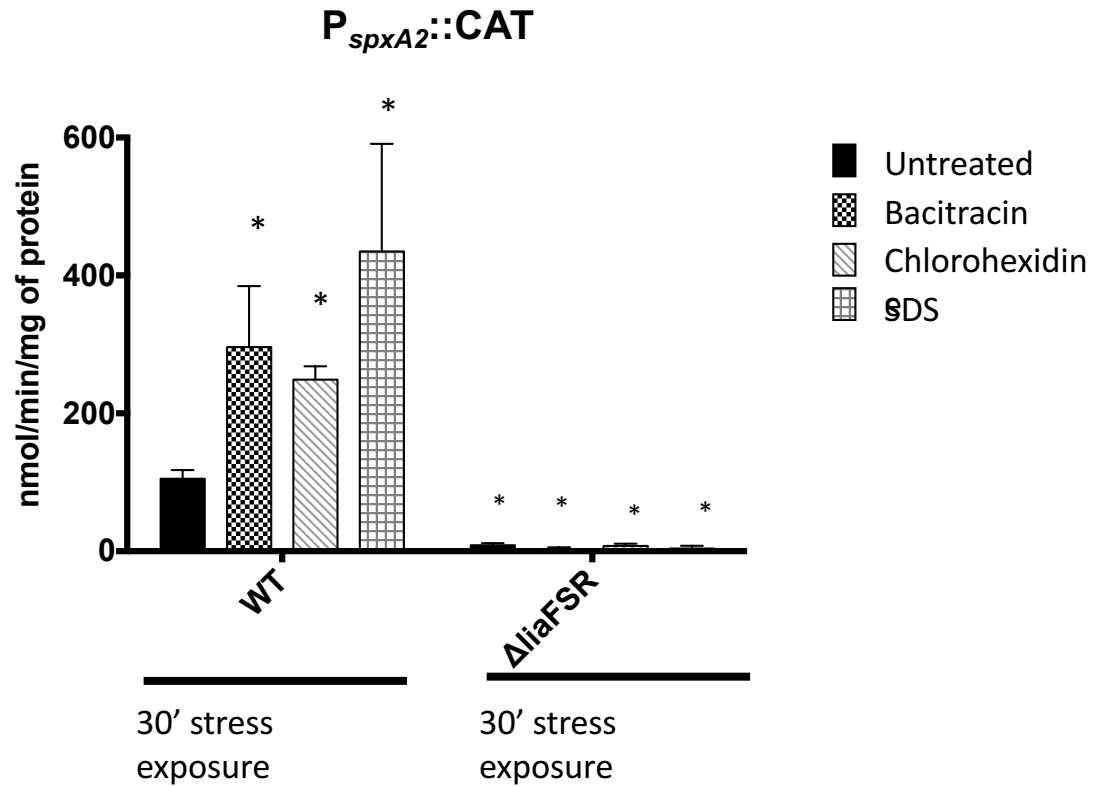

**Figure S4.** CAT activity of  $P_{spxA2}$  under 30' treatment of cell envelope stresses in parent strain UA159 and isogenic mutant strain  $\Delta liaFSR$ .
