# Supplementary material
Source: PubMed Central journal article supplement (PMC7367440)
Supplement: NIHMS1579211-supplement-Supp_FigS5.pdf [file NIHMS1579211-supplement-Supp_FigS5.pdf]

**Fig. S5**

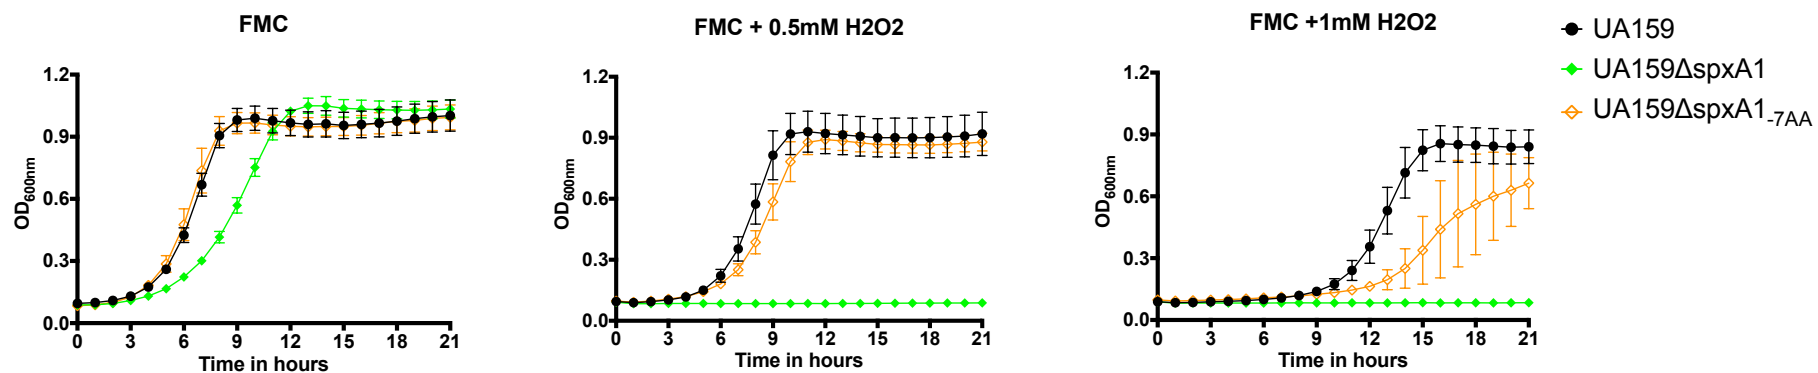

**Figure S5.** Effect of increasing amount of oxidative stress (H<sub>2</sub>O<sub>2</sub>) on growth of parental strain UA159, isogenic mutant strain  $\Delta$ spxA1 mutant and SpxA1<sub>-7AA</sub>
