# Supplementary material
Source: PubMed Central journal article supplement (PMC7367440)
Supplement: NIHMS1579211-supplement-Supp_FigS6.pdf [file NIHMS1579211-supplement-Supp_FigS6.pdf]

**Fig. S6**

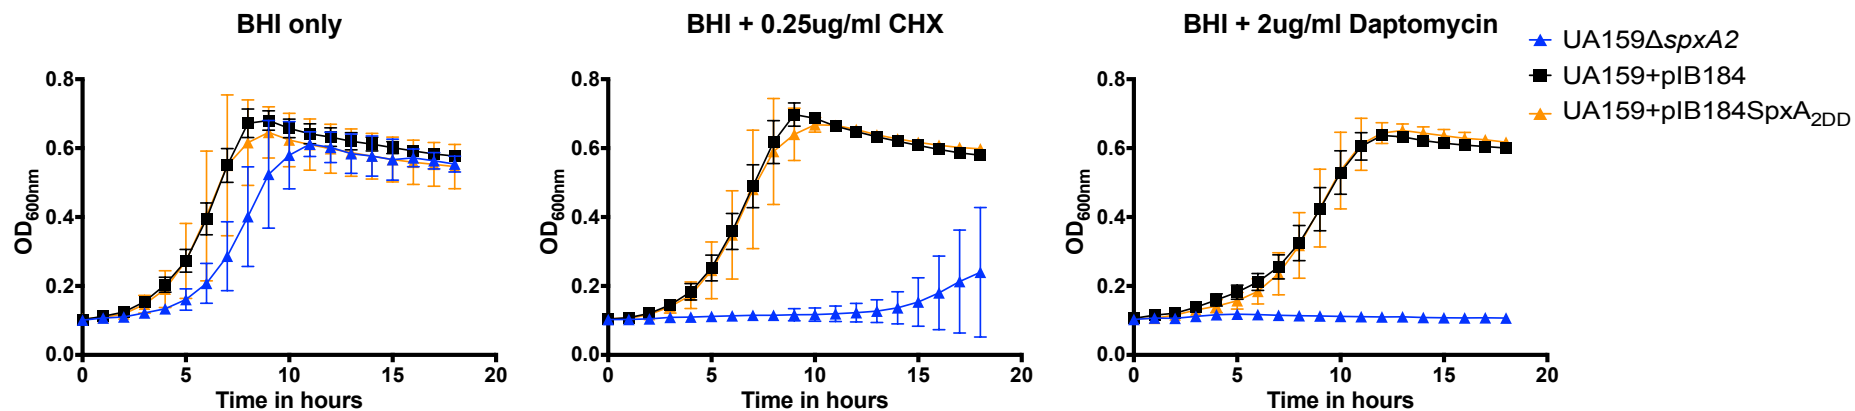

**Figure S6.** Effect of cell envelope stressors on growth of parental strain UA159 carrying pIB184 vector, isogenic mutant strain  $\Delta$ spxA2 mutant and UA159 carrying stabilized SpxA2 in pIB184
