# Supplementary material
Source: PubMed Central journal article supplement (PMC7367440)

**Fig. S7**

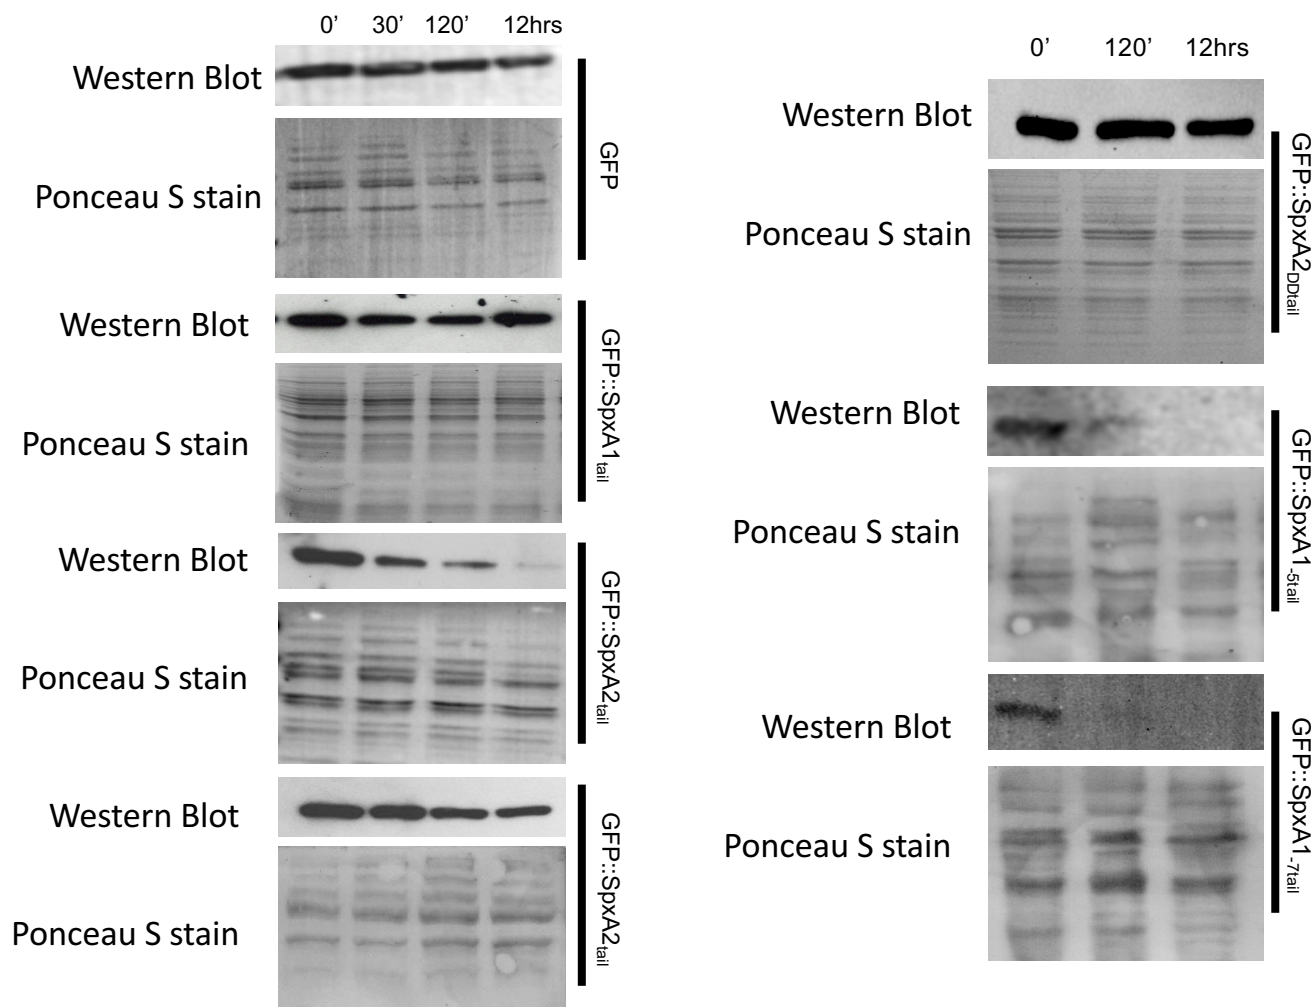

Supplement: NIHMS1579211-supplement-Supp_FigS7.pdf [file NIHMS1579211-supplement-Supp_FigS7.pdf]
